# Supplementary material for: Increases in surface ozone pollution in China from 2013 to 2019: anthropogenic and meteorological influences
Source: Copernicus journal article supplement (doi:10.5194/acp-20-11423-2020), 2020-10-06
Supplement: Supplementary file 1 [file acp-20-11423-2020-supplement.pdf]

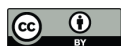

*Supplement of*

## **Increases in surface ozone pollution in China from 2013 to 2019: anthropogenic and meteorological influences**

**Ke Li et al.**

*Correspondence to:* Ke Li (keli@seas.harvard.edu)

The copyright of individual parts of the supplement might differ from the CC BY 4.0 License.

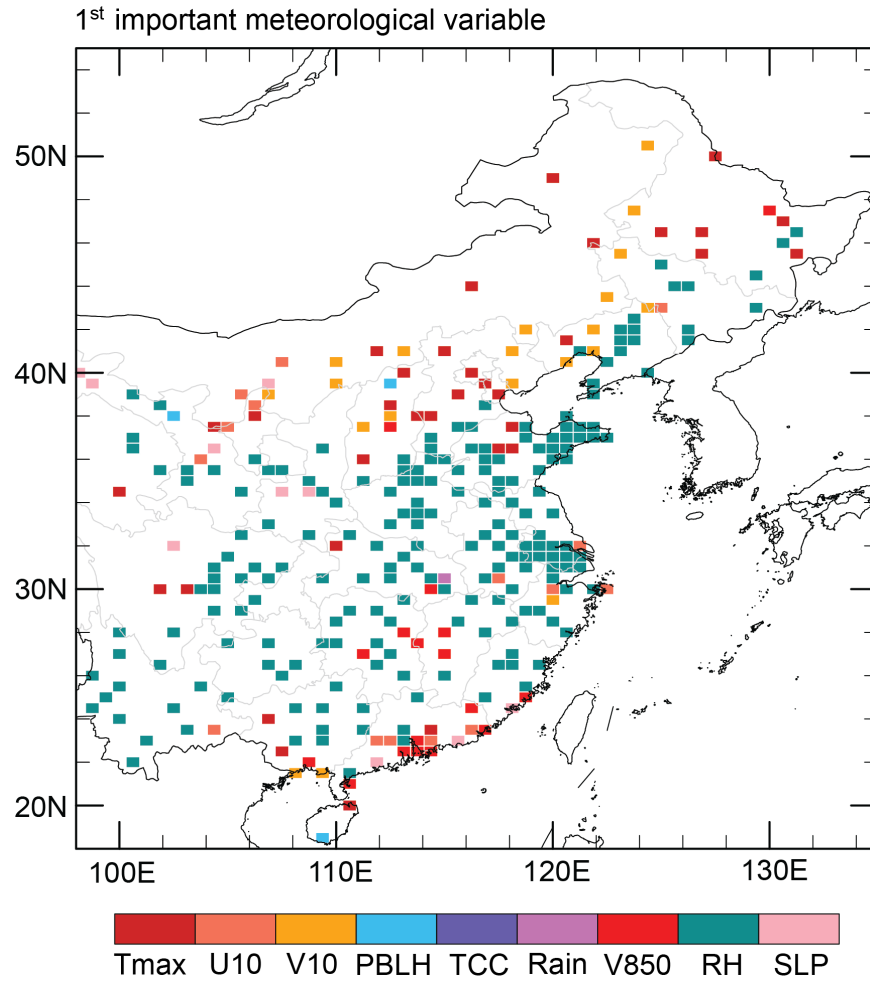

**Figure S1. Meteorological drivers of summer MDA8 ozone in China, 2013–2019.** The figure shows the 1<sup>st</sup> most important meteorological variable with a statistically significant relationship with daily MDA8 ozone ( $p < 0.05$ ) for each  $0.5^\circ \times 0.625^\circ$  grid cell. Tmax: daily maximum 2-m air temperature; U10: 10-m zonal wind; V10: meridional wind; PBLH: planetary boundary layer height; TCC: total cloud area fraction; Rain: rainfall; SLP: sea level pressure; RH: relative humidity; V850: 850-hPa meridional wind.

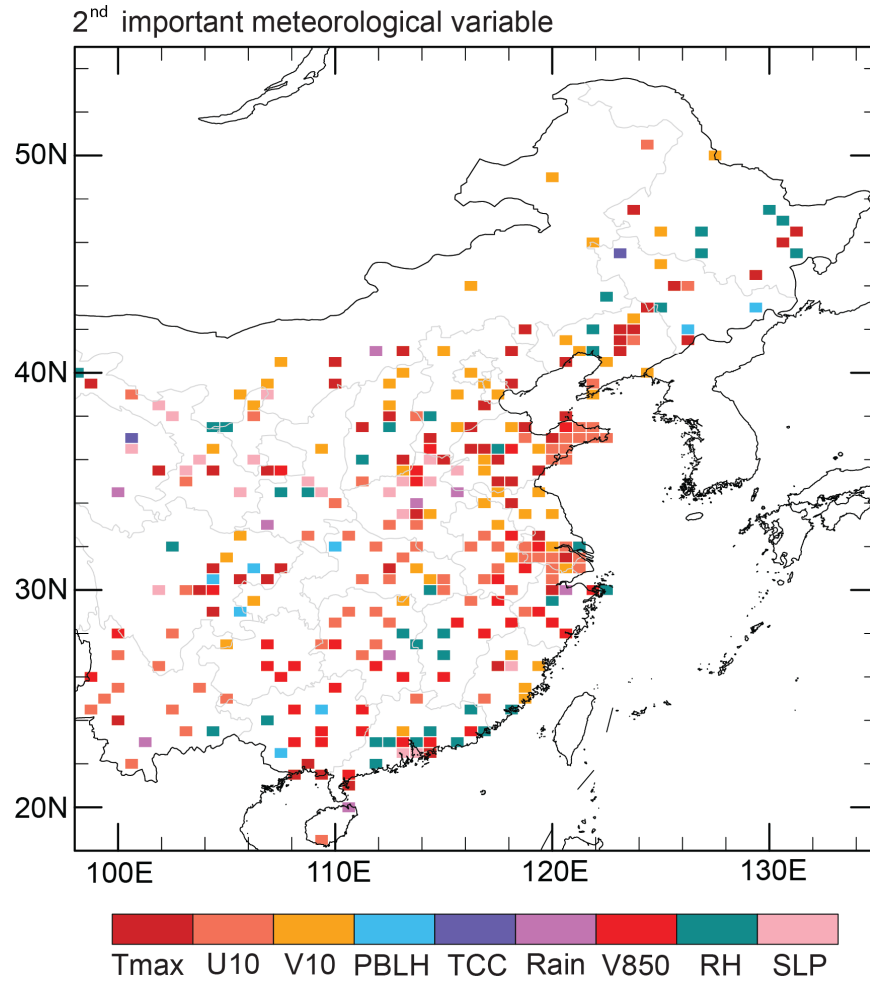

**Figure S2.** Same with Figure S1 but for the 2<sup>nd</sup> most important meteorological variable.

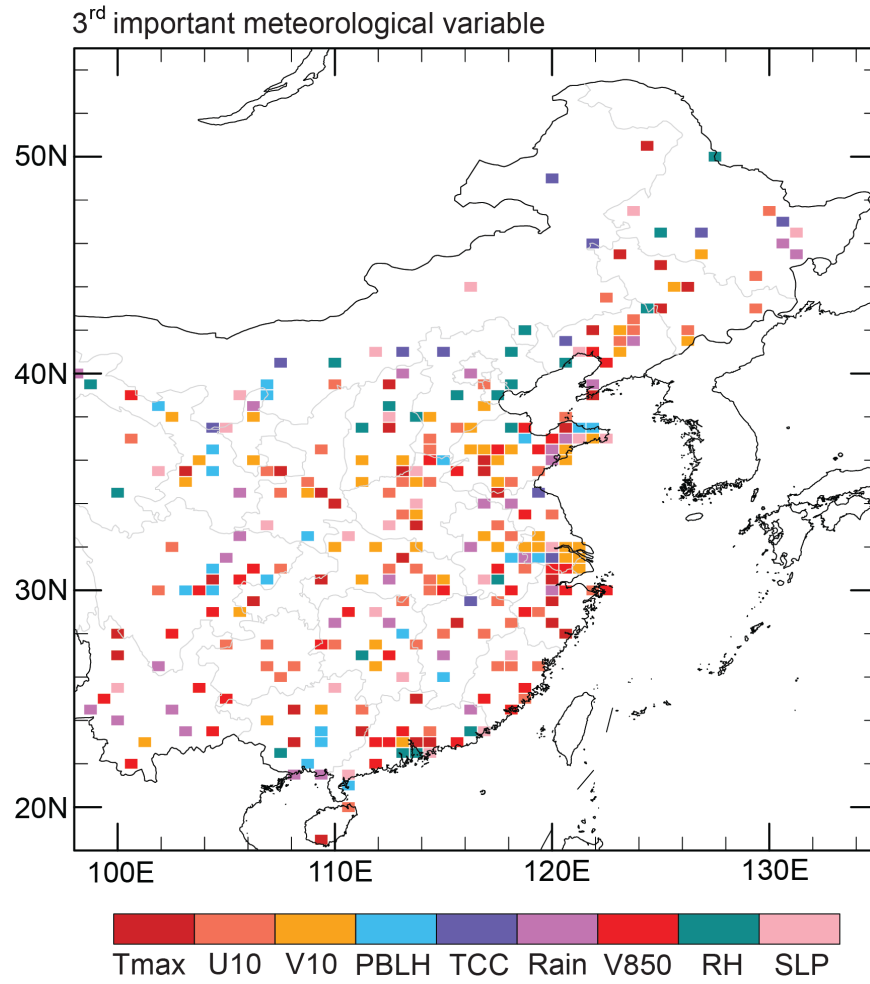

**Figure S3.** Same with Figure S1 but for the 3<sup>rd</sup> most important meteorological variable.

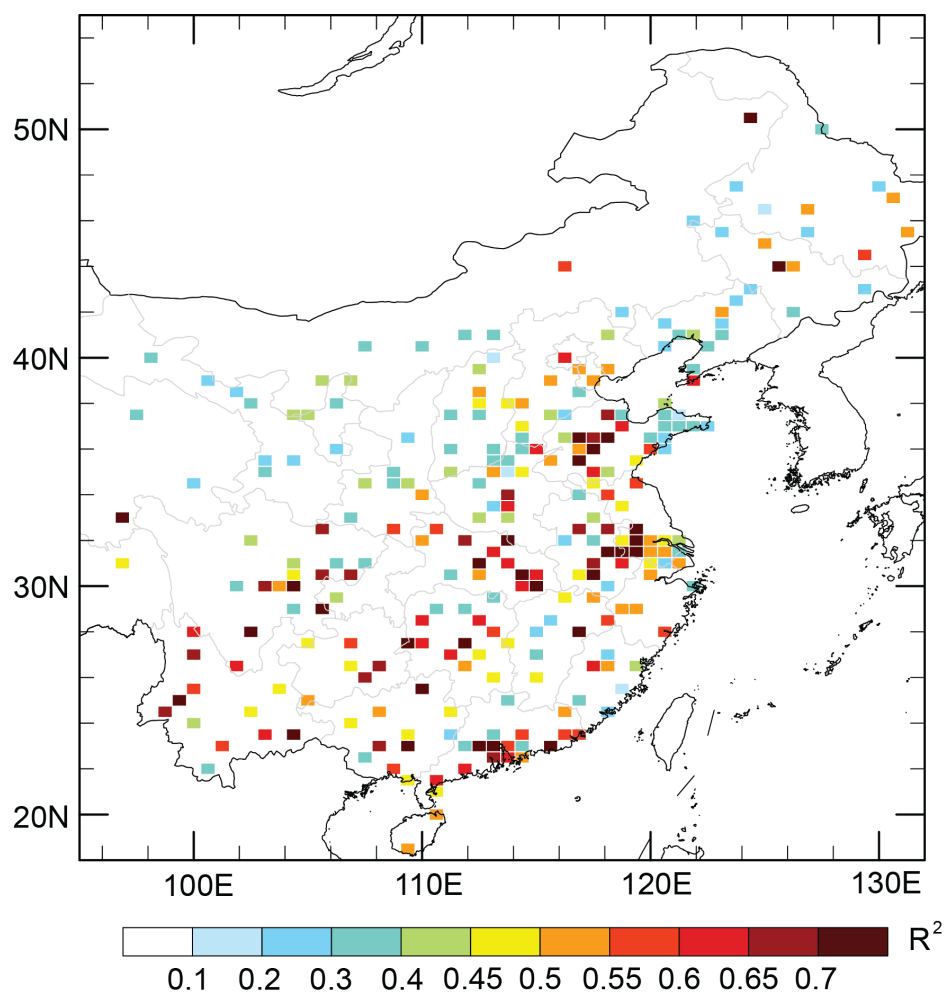

**Figure S4.** Coefficient of determination ( $R^2$ ) for fitting deseasonalized monthly MDA8 summer ozone trends over 2013–2019 with meteorological variables following the MLR model (see text). Only grid cells with statistical significance above the 95% confidence level are shown.

2013-2019 summertime MDA8 ozone trends

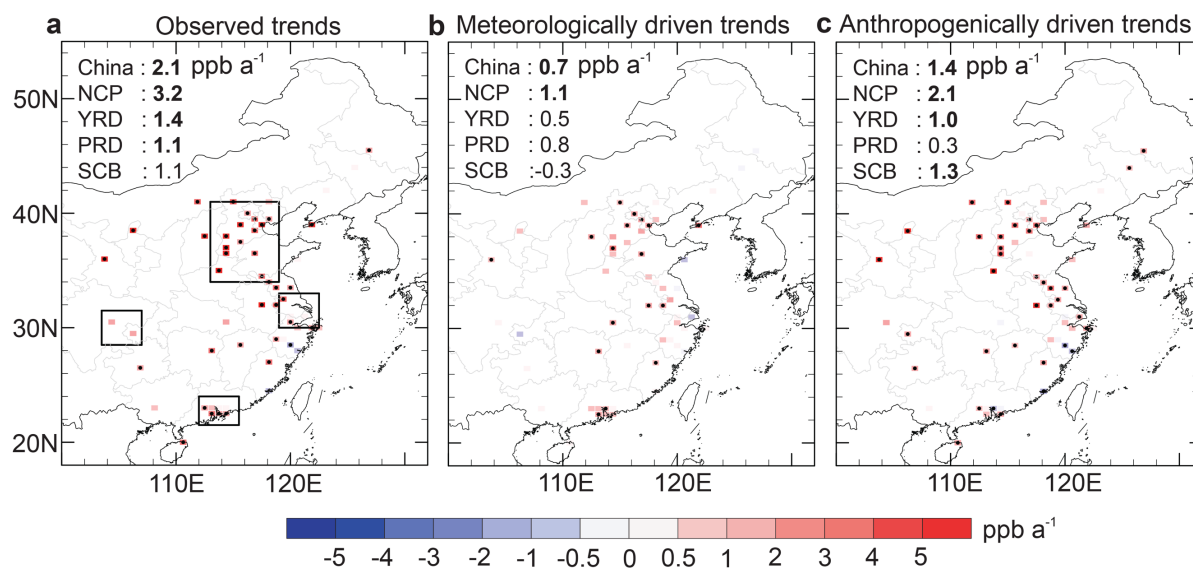

**Figure S5.** Same with Figure 2 but only for the sites with continuous records from 2013 to 2019.
